# Supplementary material for: Red to orange thermally activated delayed fluorescence polymers based on 2-(4-(diphenylamino)-phenyl)-9H-thioxanthen-9-one-10,10-dioxide for efficient solution-processed OLEDs
Source: Royal Society of Chemistry journal article supplement (doi:10.1039/d1ra04599g), 2021-01-01

## Supporting information

### Red to orange thermally activated delayed fluorescence polymers based on 2-(4-(diphenylamino)-phenyl)-9*H*-thioxanthen-9-one-10,10-dioxide for efficient solution-processed OLEDs

Praetip Khammultri,<sup>a</sup> Pongsakorn Chasing,<sup>a</sup> Chirawat Chitpakdee,<sup>b</sup> Supawadee Namuangruk,<sup>b</sup> Taweesak Sudyoadsuk,<sup>a</sup> and Vinich Promarak<sup>\*ac</sup>

<sup>a</sup>Department of Material Science and Engineering, School of Molecular Science & Engineering, Vidyasirimedhi Institute of Science and Technology, Wangchan, Rayong 21210, Thailand. E-mail:

[vinich.p@vistec.ac.th](mailto:vinich.p@vistec.ac.th)

<sup>b</sup>National Nanotechnology Center (NANOTEC), National Science and Technology Development Agency, Pathum Thani, 12120, Thailand.

<sup>c</sup>Research Network of NANOTEC-VISTEC on Nanotechnology for Energy, Vidyasirimedhi Institute of Science and Technology, Wangchan, Rayong, 21210, Thailand.

#### Additional characterization data

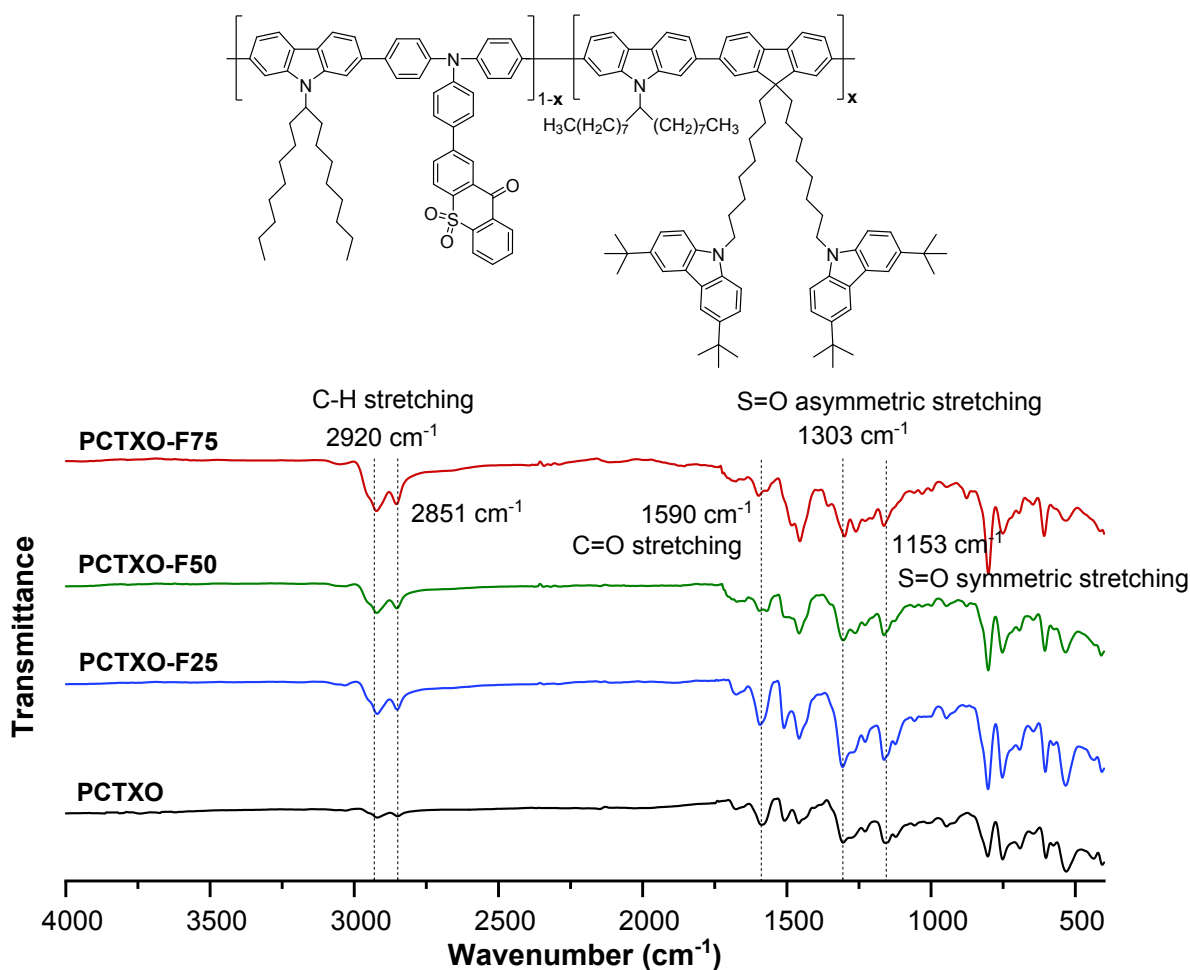

Fig. S1 ATR FTIR spectra of the polymers

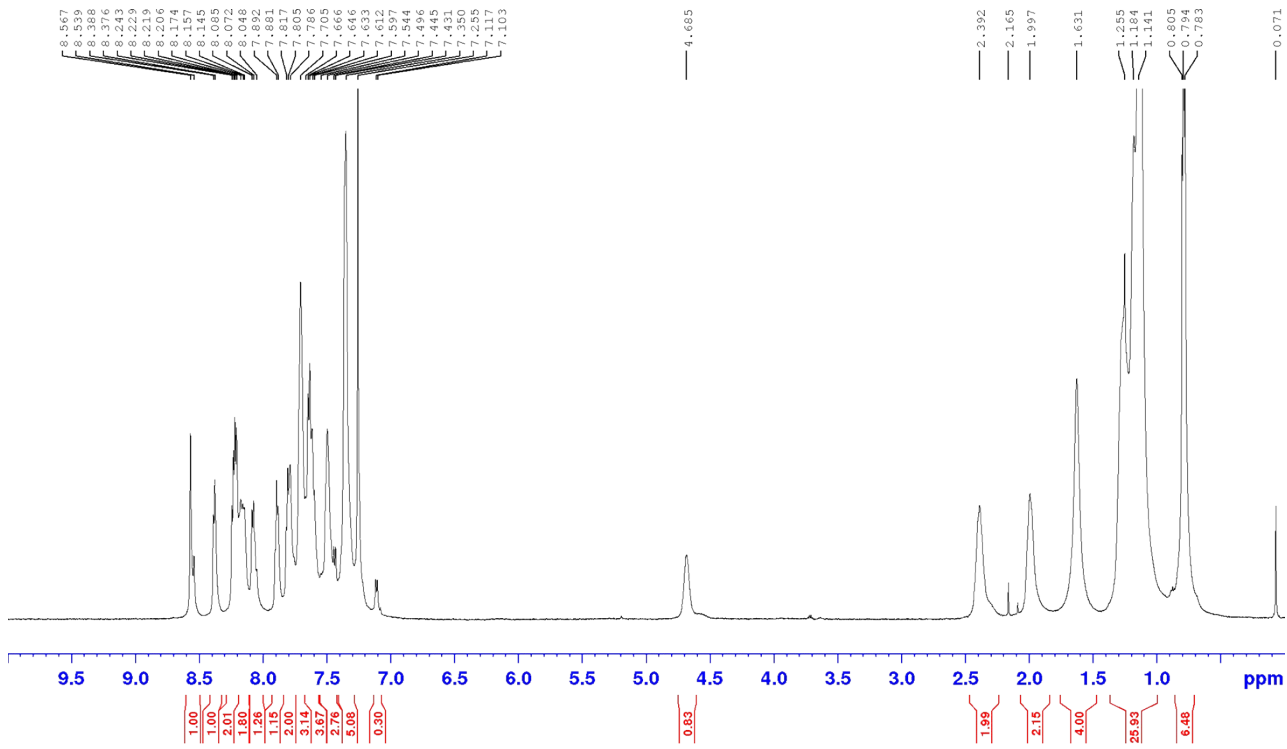

PCTXO

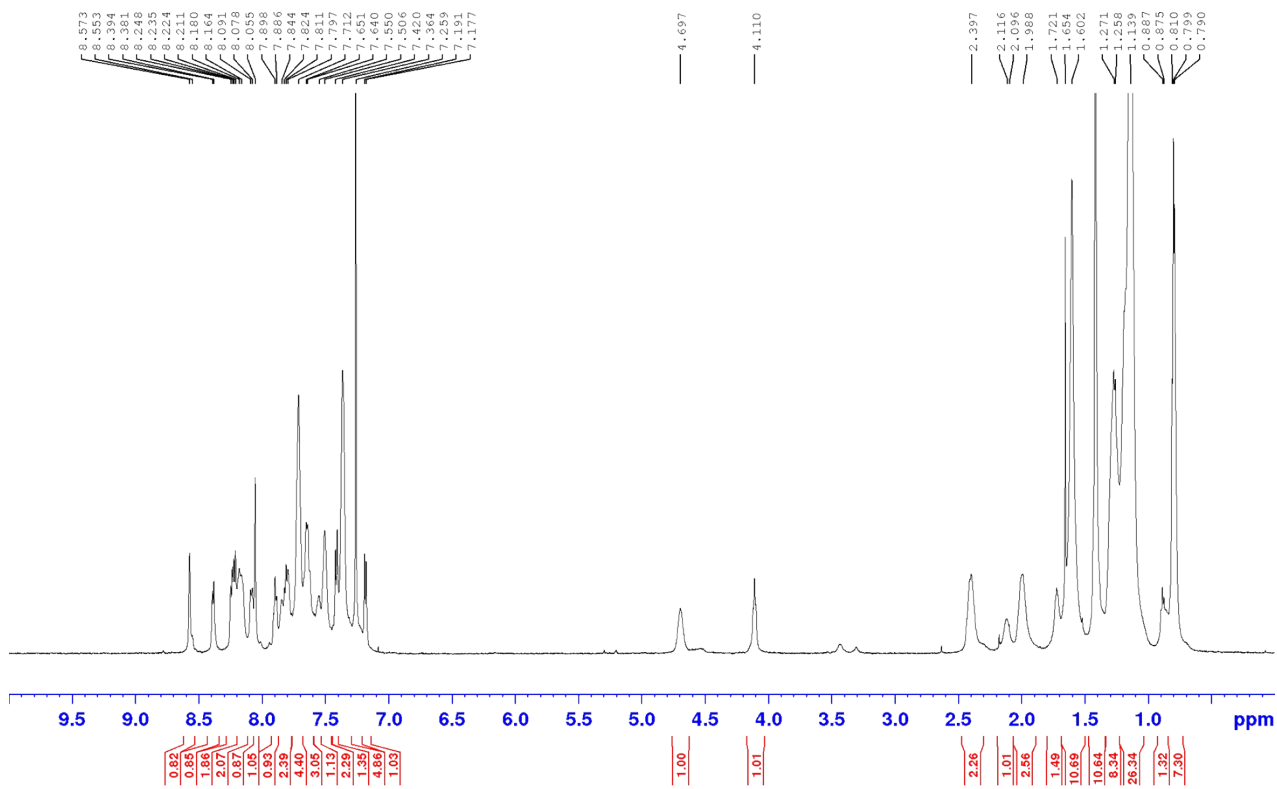

PCTXO-F25

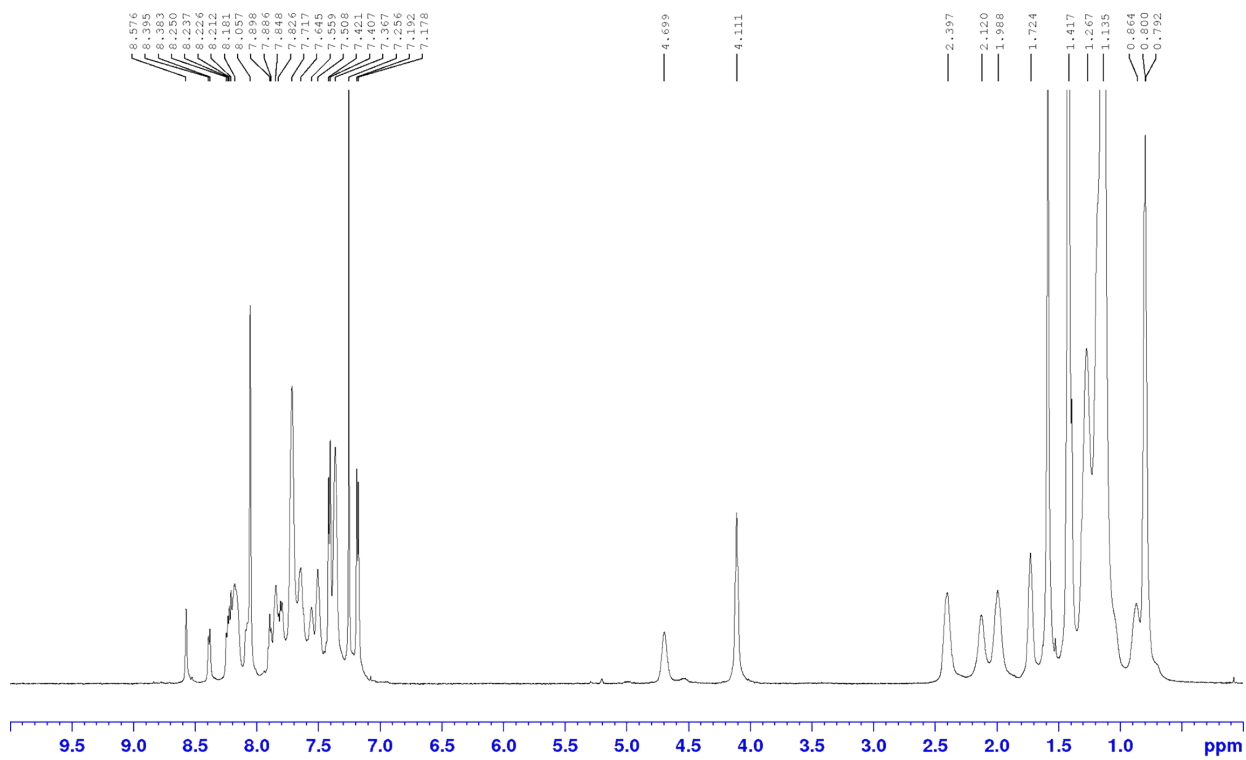

**PCTXO-F50**

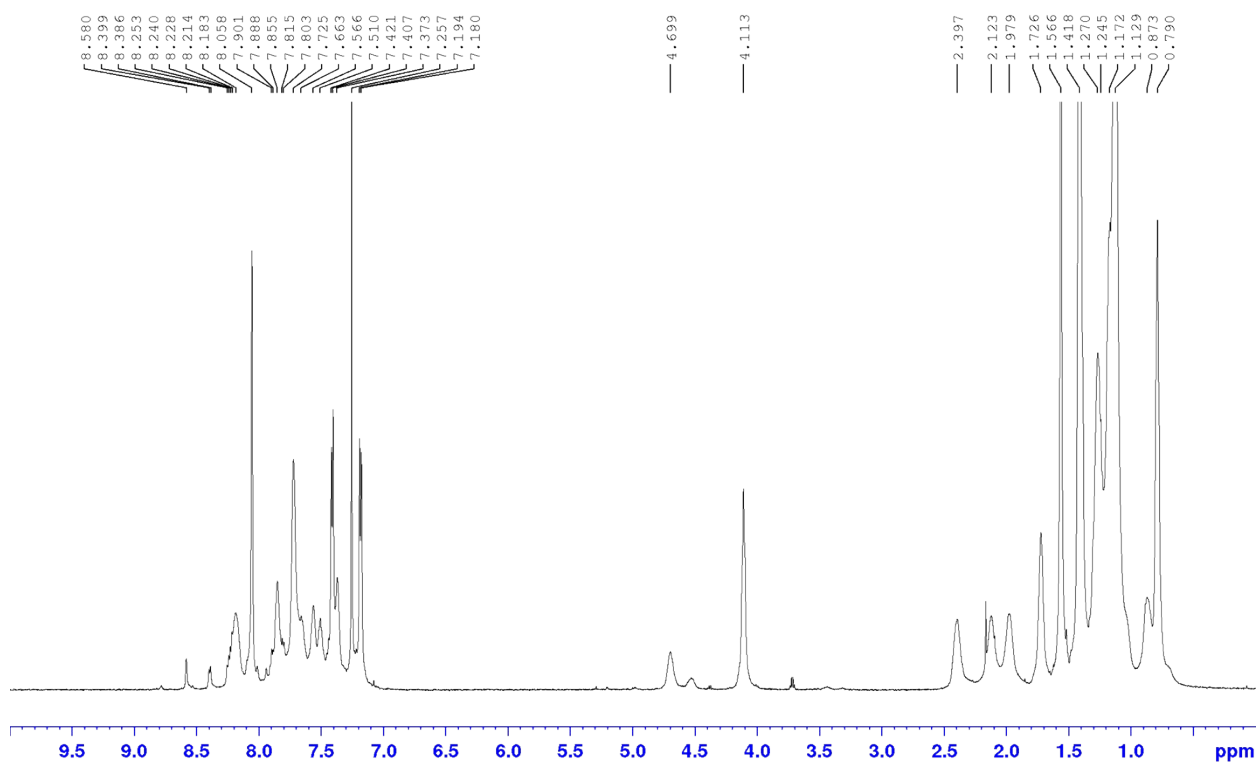

**PCTXO-F75**

**Fig. S2** 600 MHz  $^1\text{H-NMR}$  spectra ( $\text{CDCl}_3$ ) of the polymers

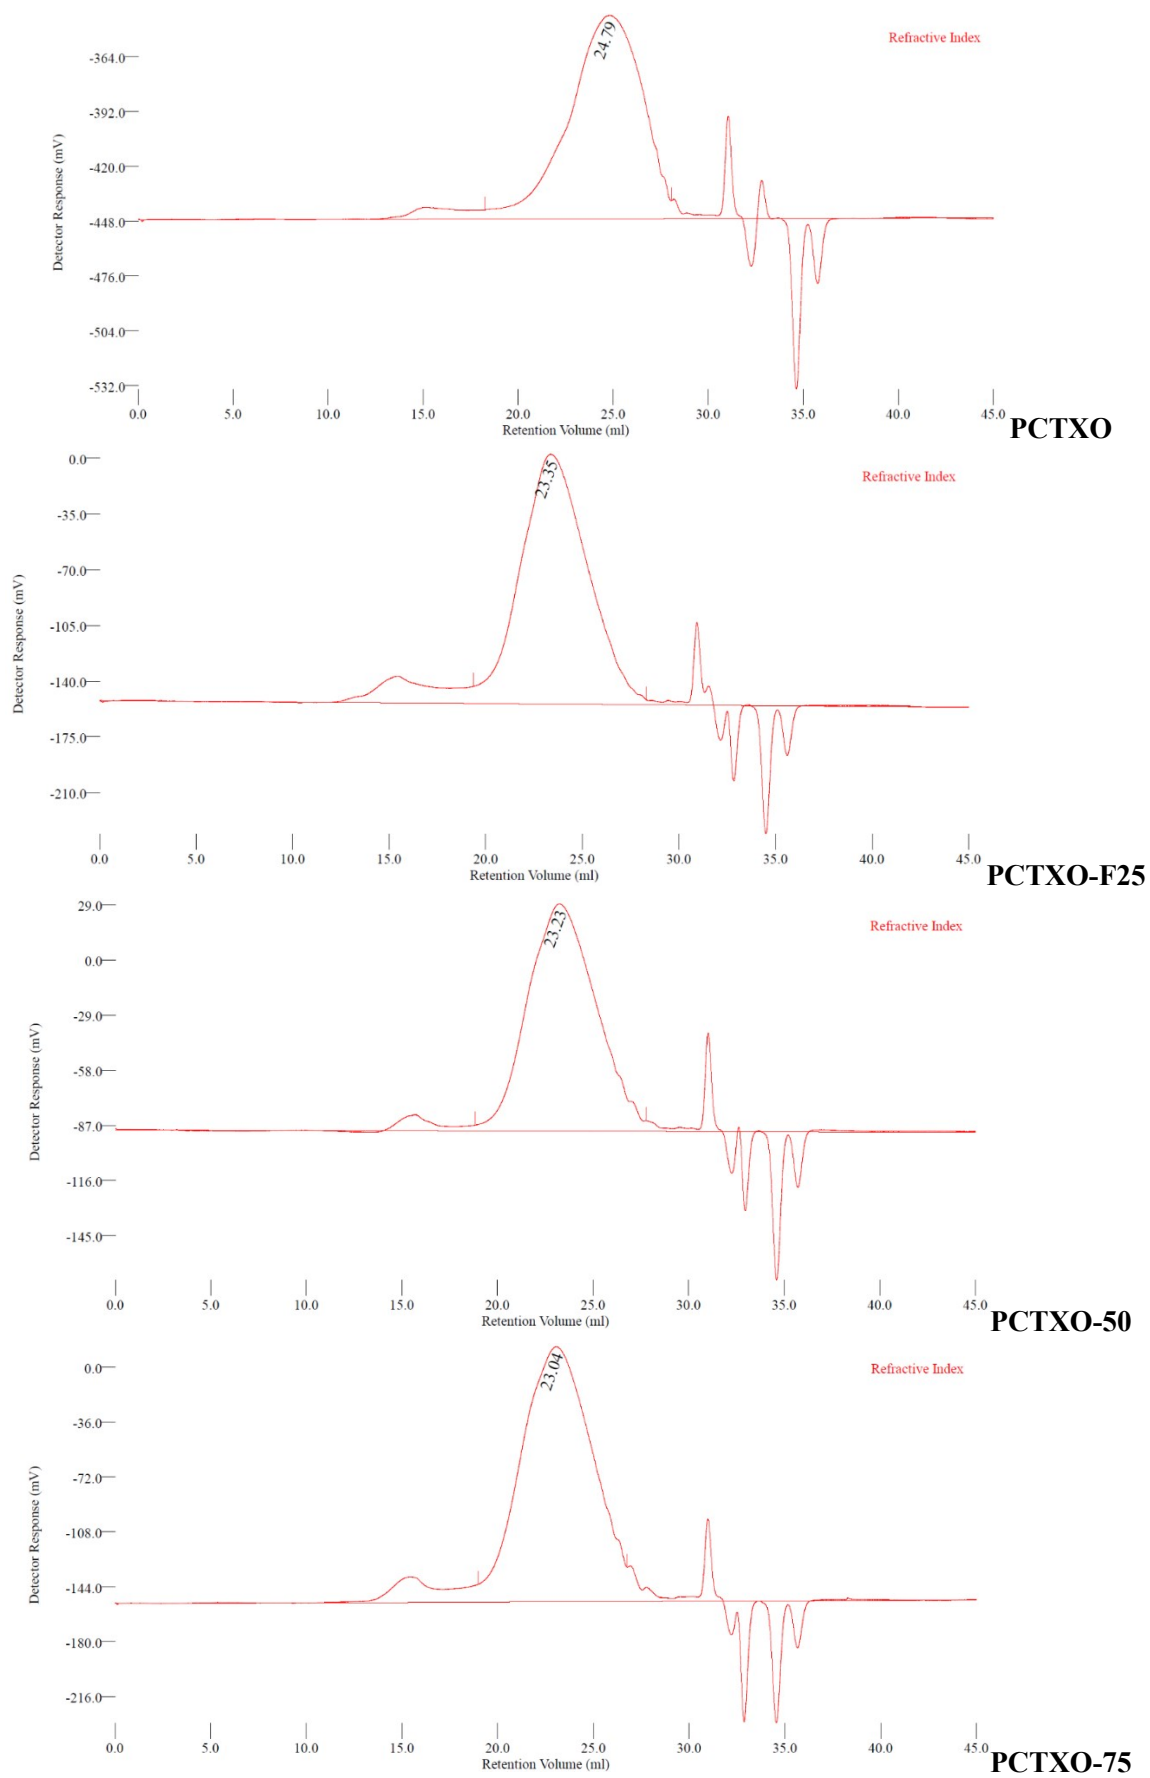

**Fig. S3** GPC traces of the polymers in THF at 35 °C with RI detector using polystyrene linear standards for calibration.

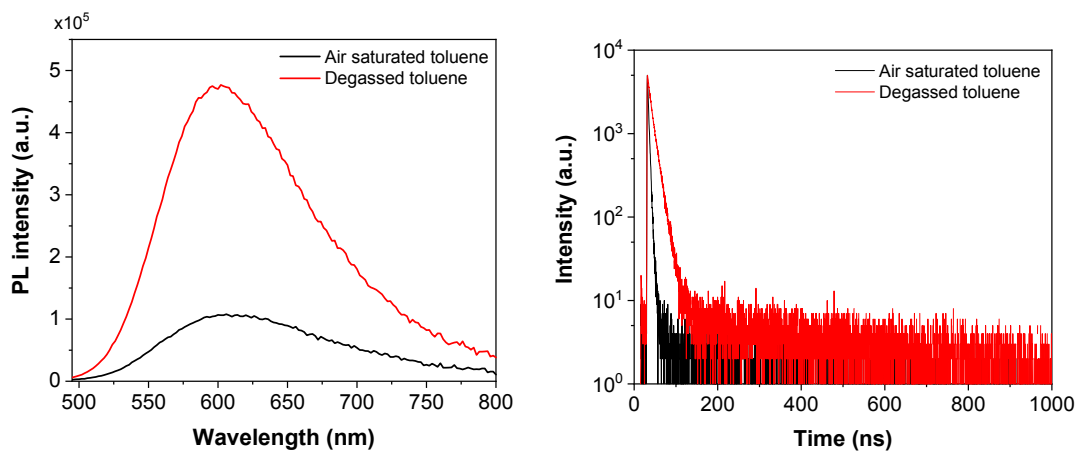

**PCTXO**

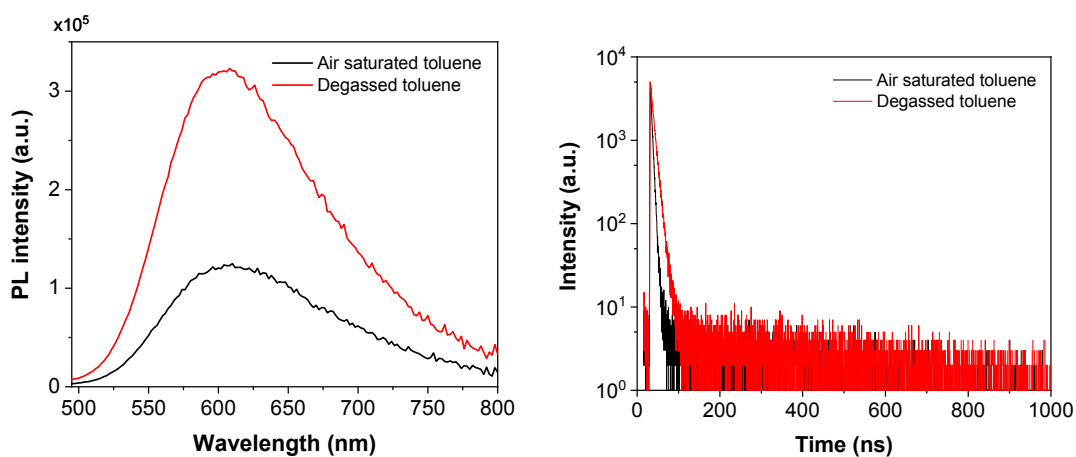

**PCTXO-F25**

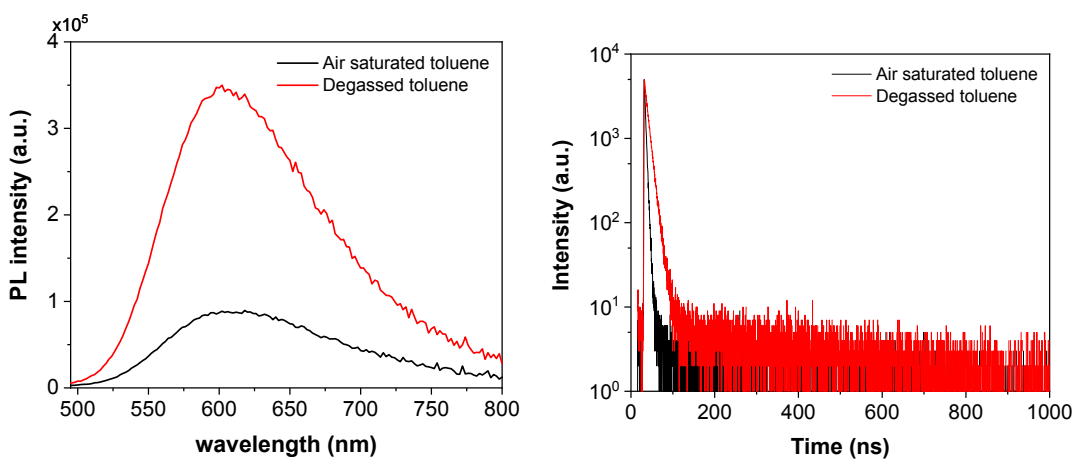

**PCTXO-F50**

**Fig. S4** PL spectra and transient PL decay spectra of air-saturated and degassed polymer toluene solutions

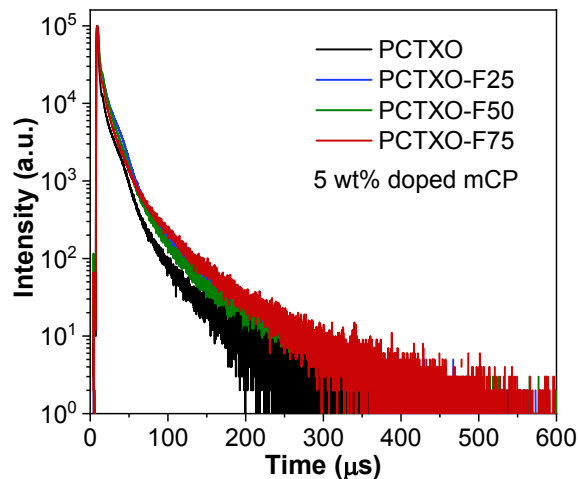

**Fig. S5** Transient PL decay spectra of the polymers 5 wt% doped mCP films at room temperature.

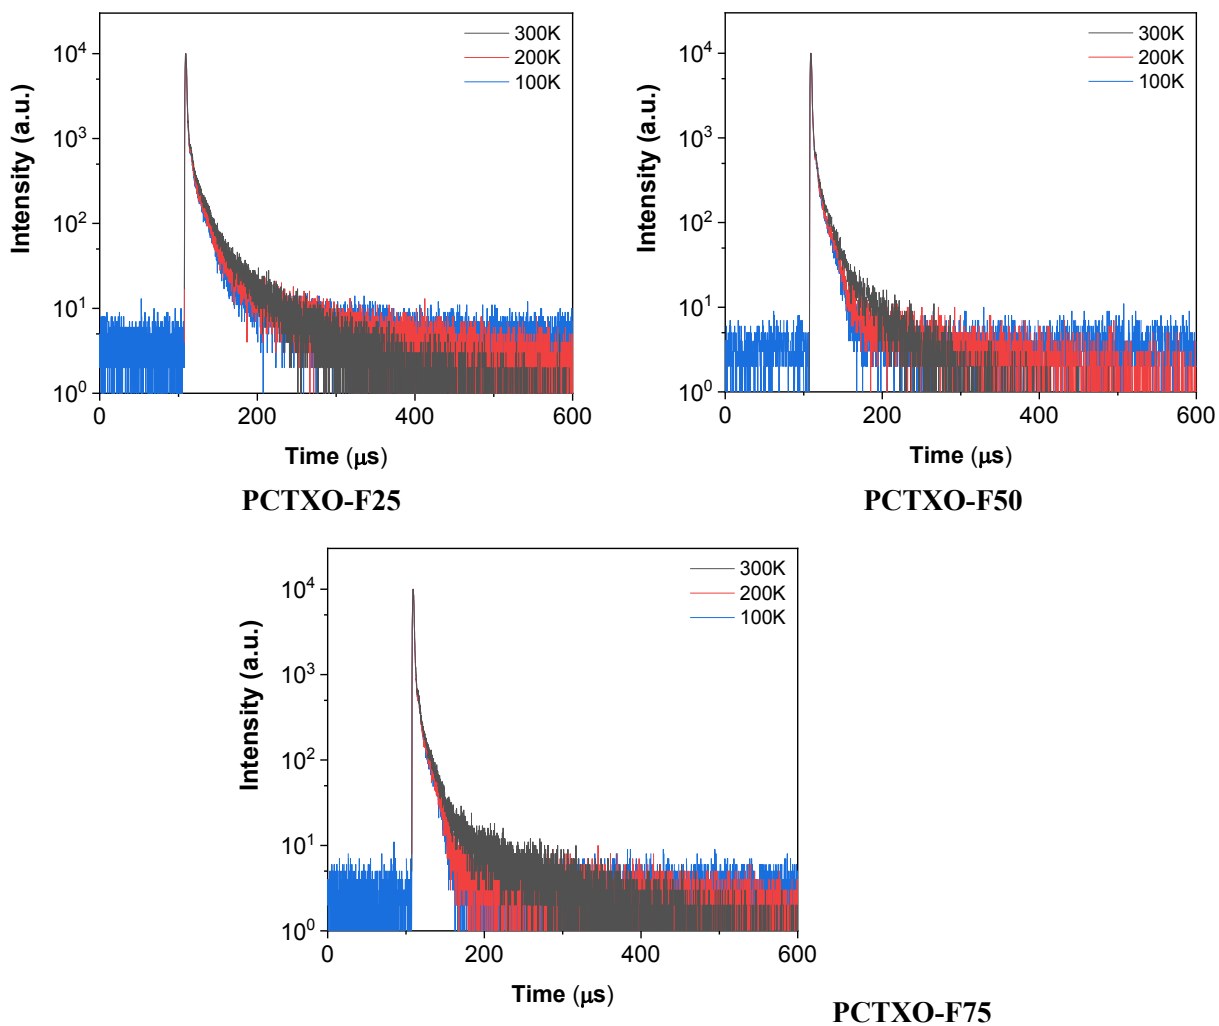

**Fig. S6** Transient PL decay spectra of the polymers **PCTXO-F<sub>x</sub>** 1 wt% doped in mCP:Zeonex film recorded at various temperatures in N<sub>2</sub>.

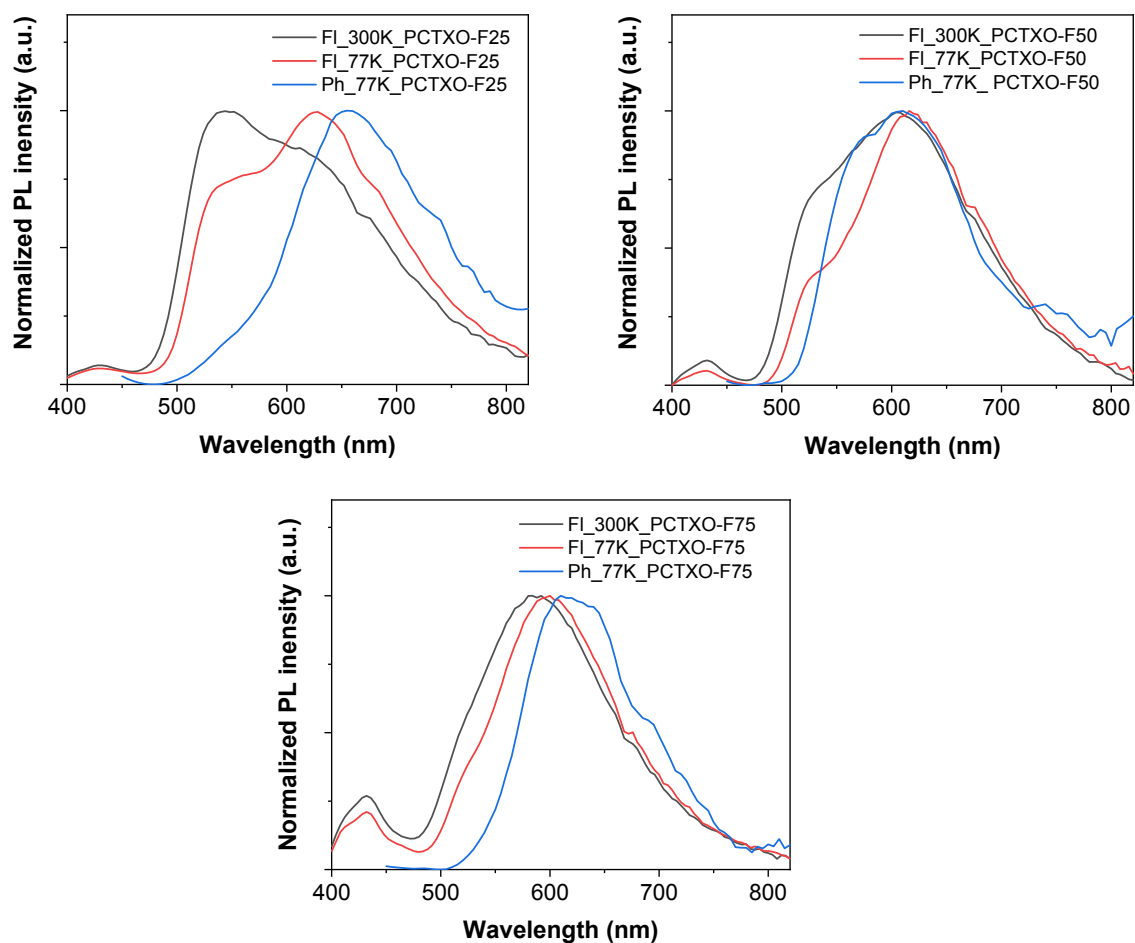

Fig. S7 Fluorescence (FI) and phosphorescence (Ph) spectra of the polymers **PCTXO-Fx** 1 wt% doped in Zeonex film recorded at 300 K and 77 K.

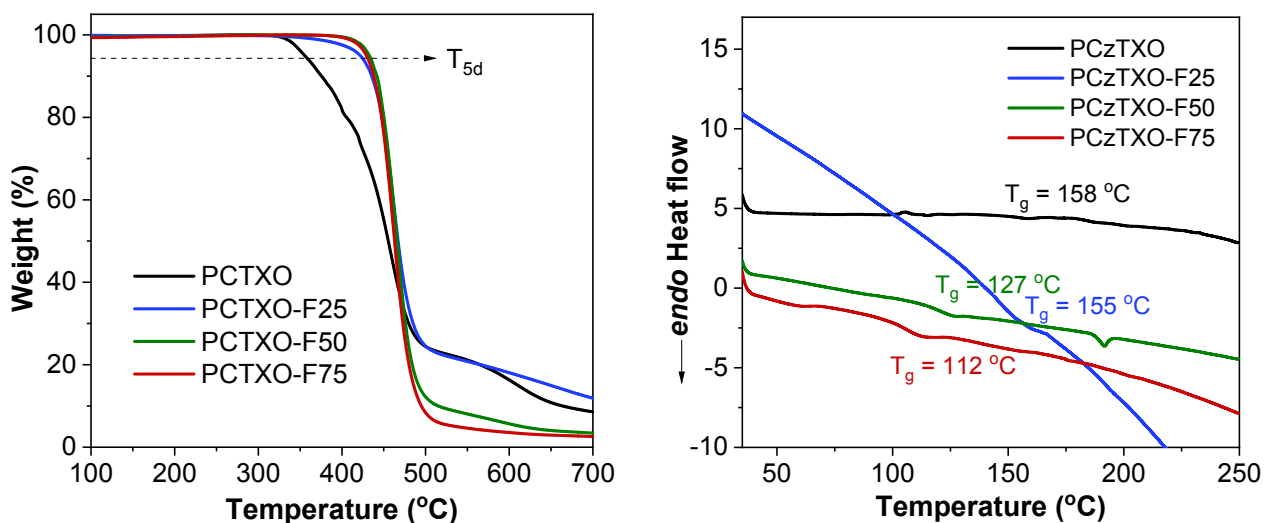

Fig. S8 TGA and DSC thermograms of **PCTXO/PCTXO-Fx** measured in N<sub>2</sub> flow at heating rate of 10 °C min<sup>-1</sup>.

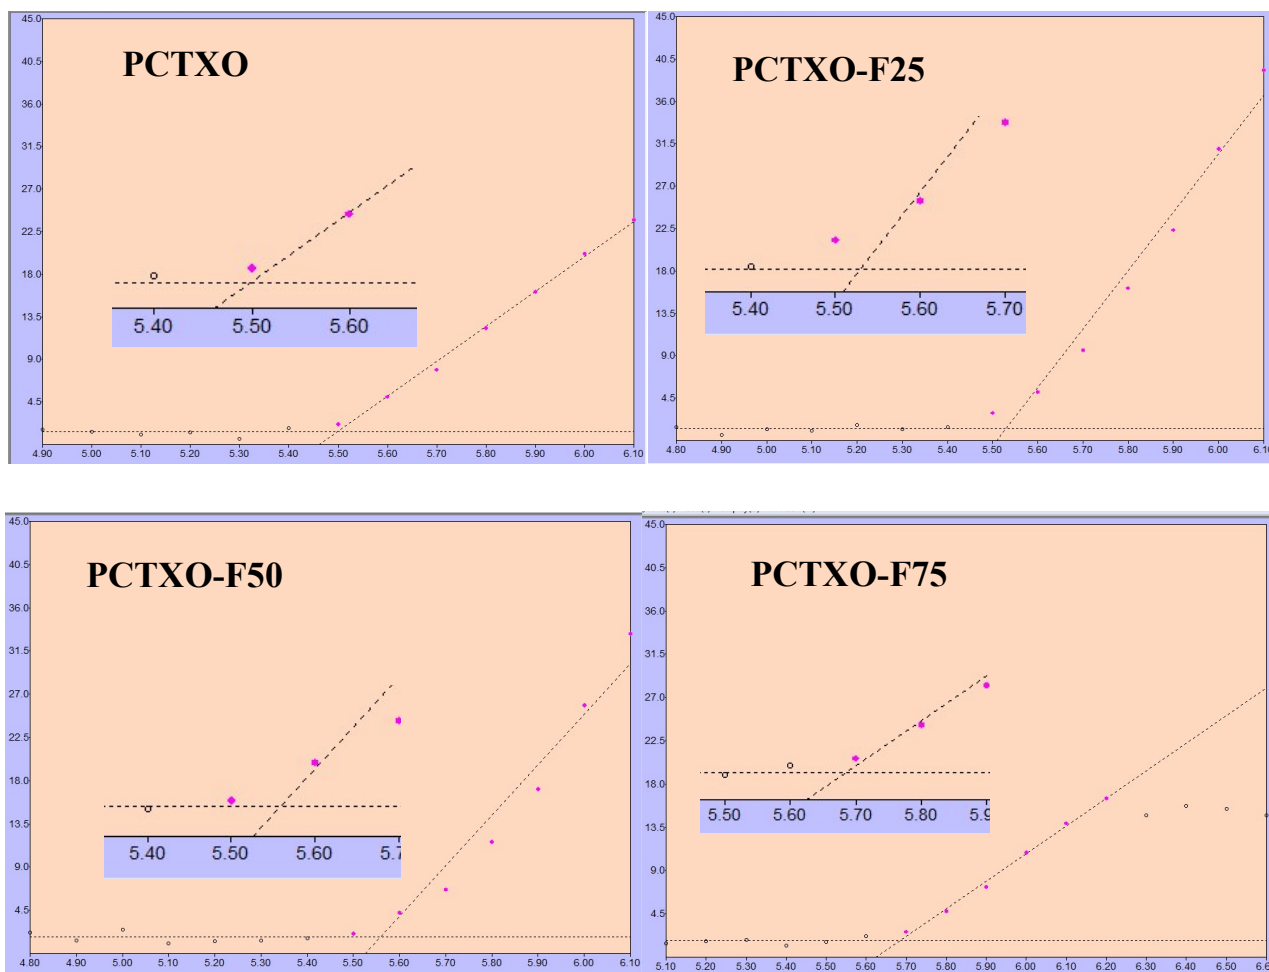

**Fig. S9** Photoelectron spectroscopy in air (PESA) spectra of the polymers.

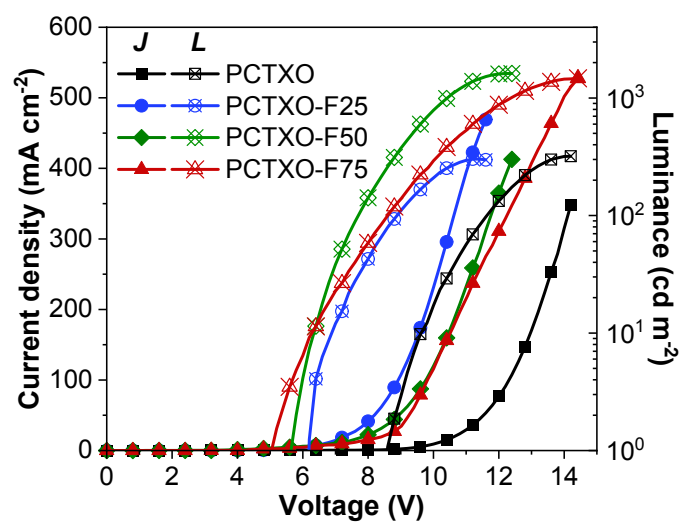

**Fig. S10** Current density–voltage–luminance ( $J-V-L$ ) characteristics of the non-doped OLEDs (devices I-IV).



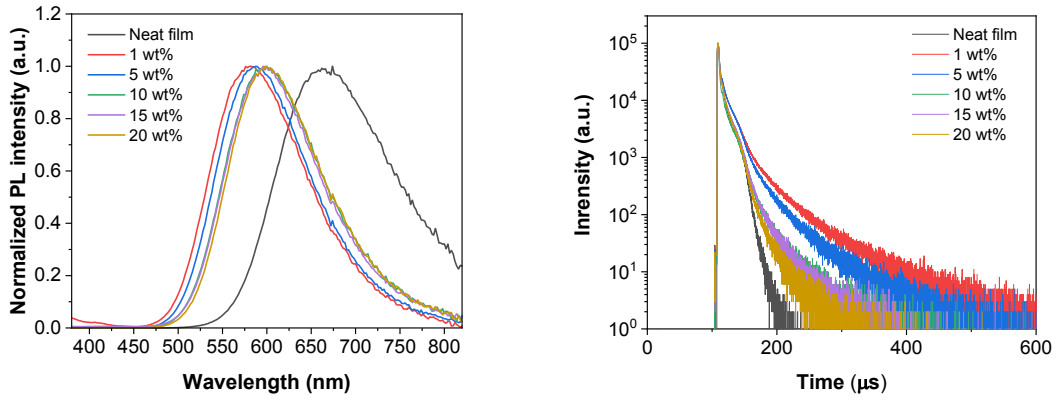

**PCTXO**

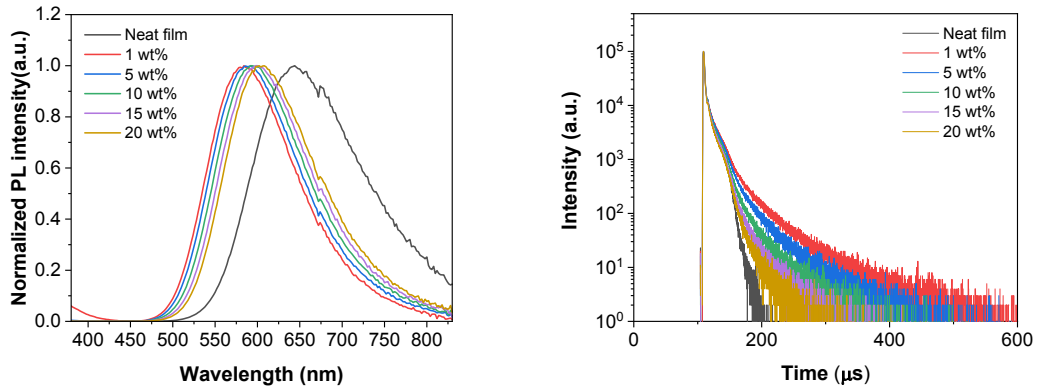

**PCTXO-F25**

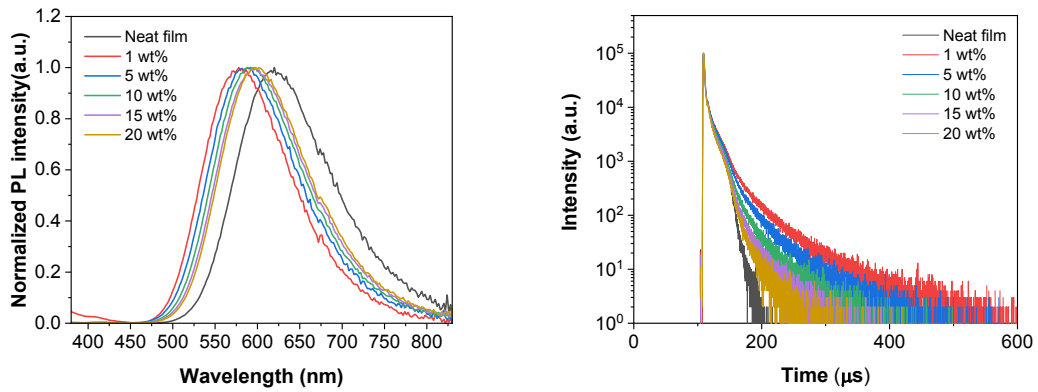

**PCTXO-F50**

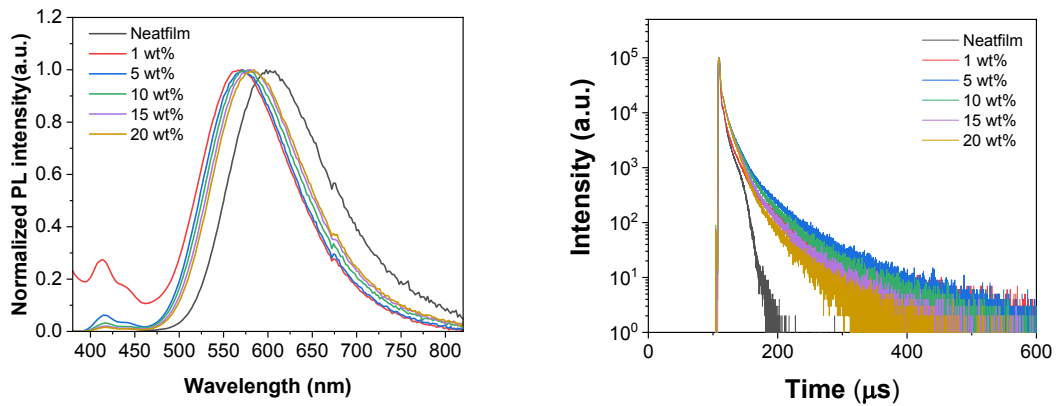

**PCTXO-F75**

**Fig. S11** PL and transient PL decay spectra of PCTXO and PCTXO-Fx doped in mCP films.

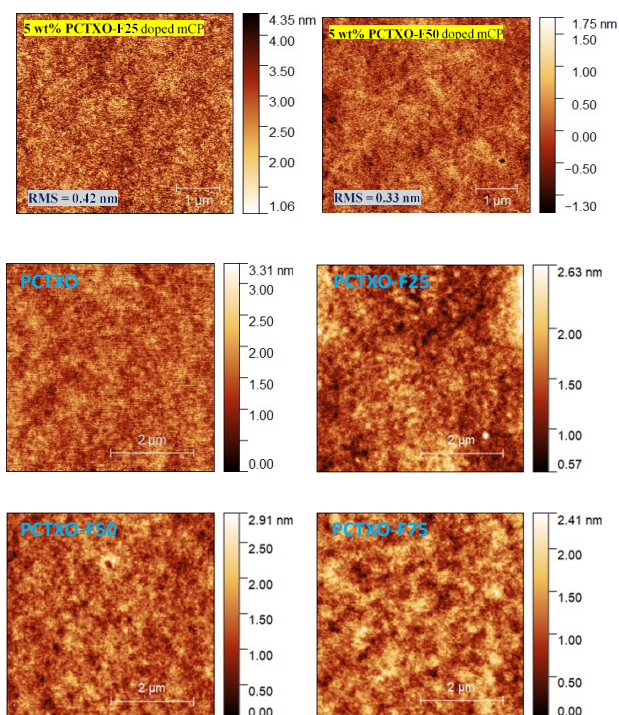

**Fig. S12** AFM images of the neat and PCTXO-F75, PCTXO-F50, PCTXO-F25, PCTXO films and PCTXO-F25 and PCTXO-F50 5 wt% doped in mCP films.

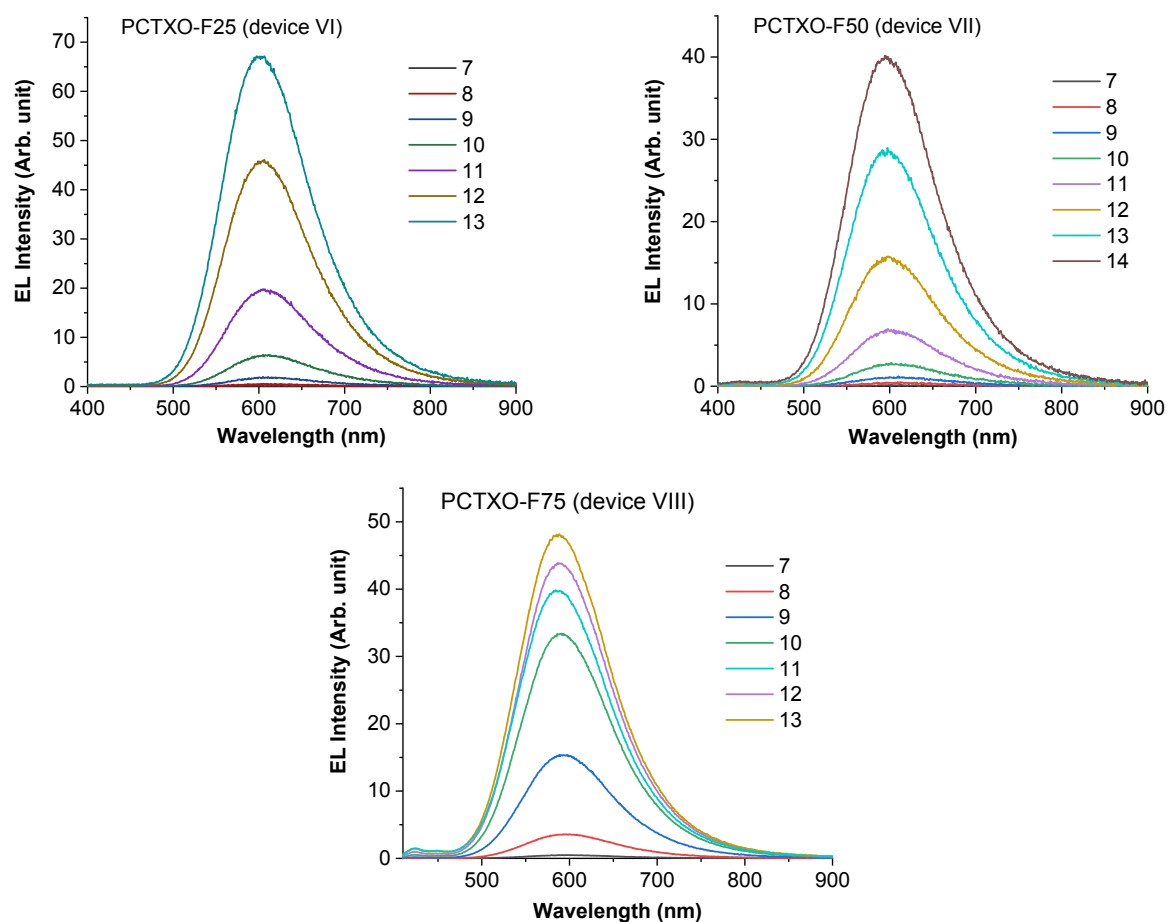

**Fig. S13** EL spectra of PCTXO-Fx-based OLEDs (devices VI-VIII) at different applied voltages

Fig. S14 Copies of NMR spectra and HRSM spectra of the intermediates.

Compound 2

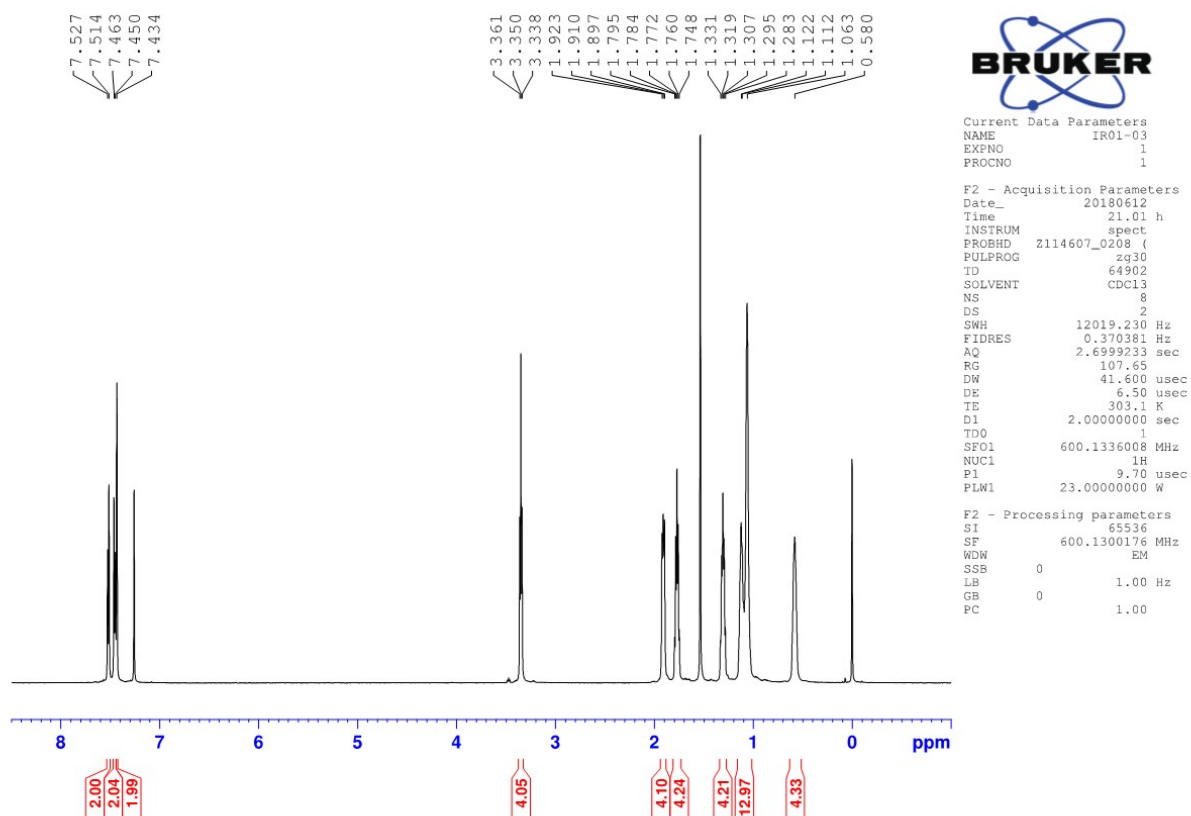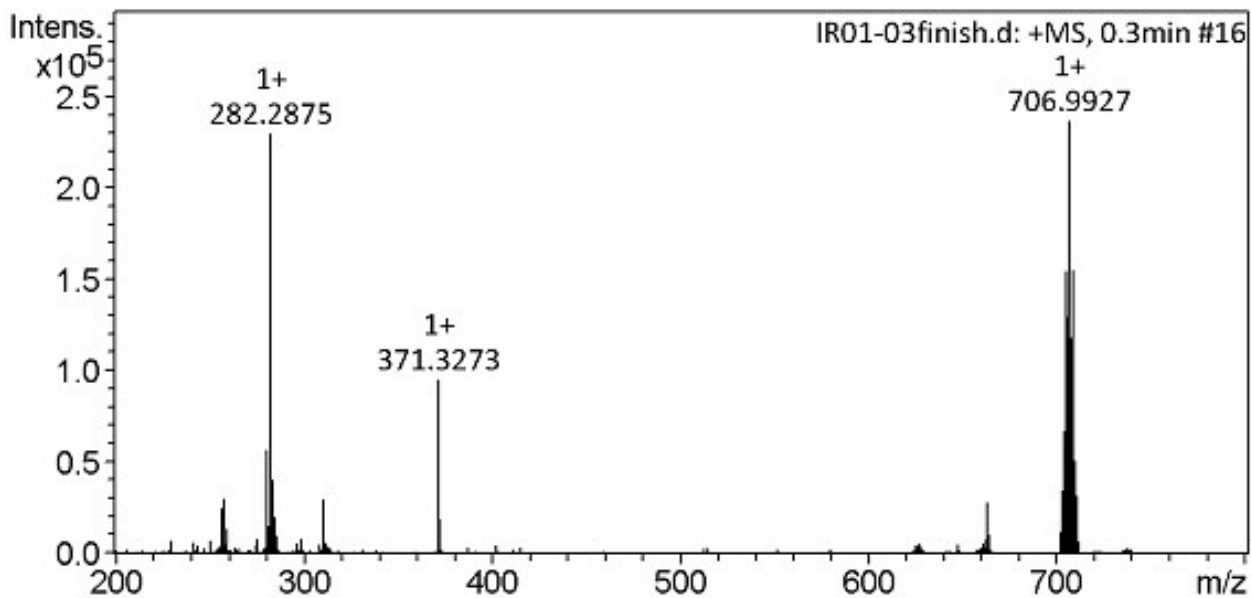

# Compounds 3

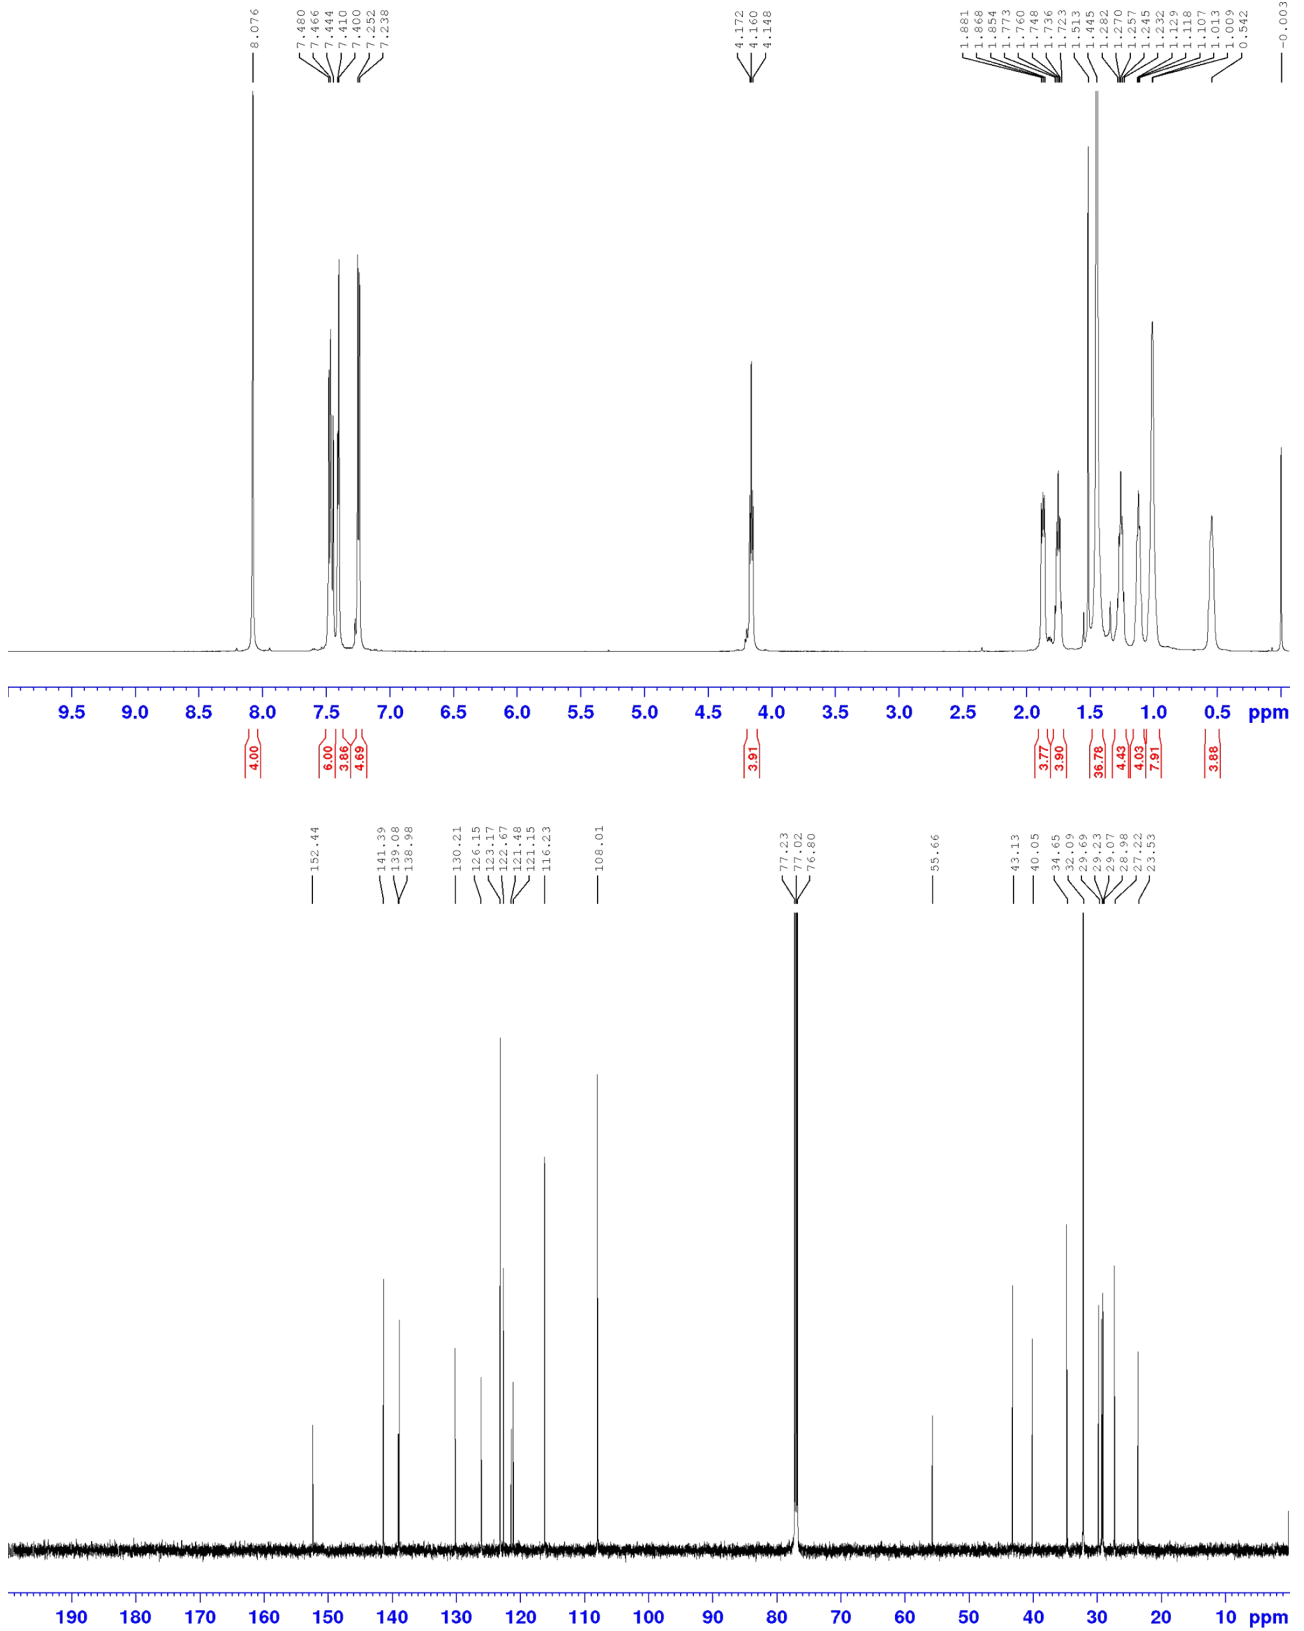

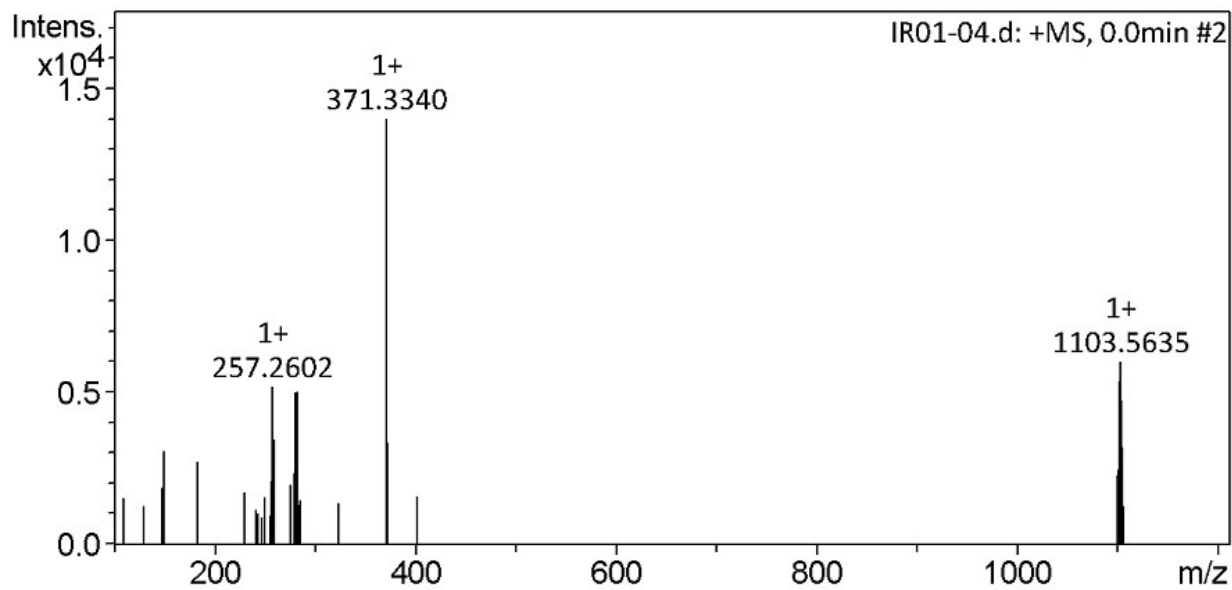

**Compound 5**

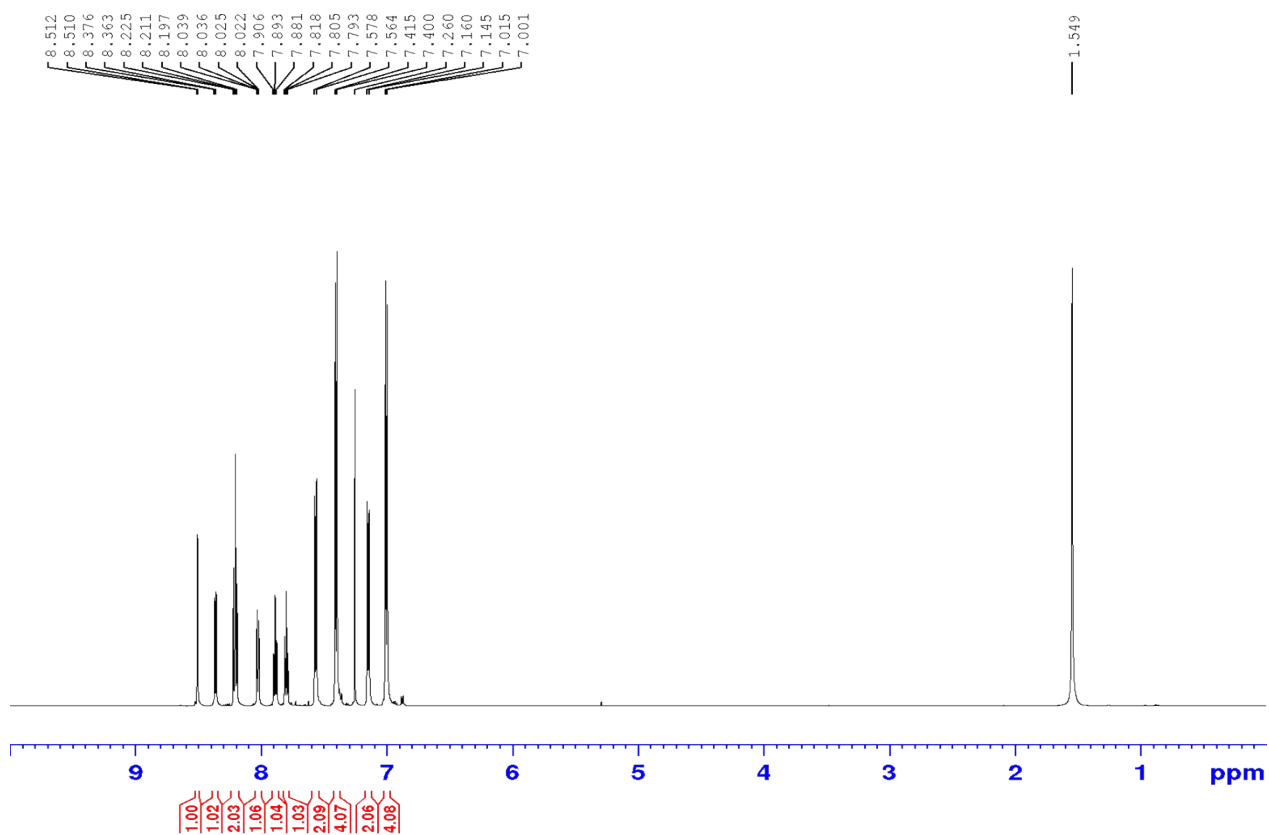

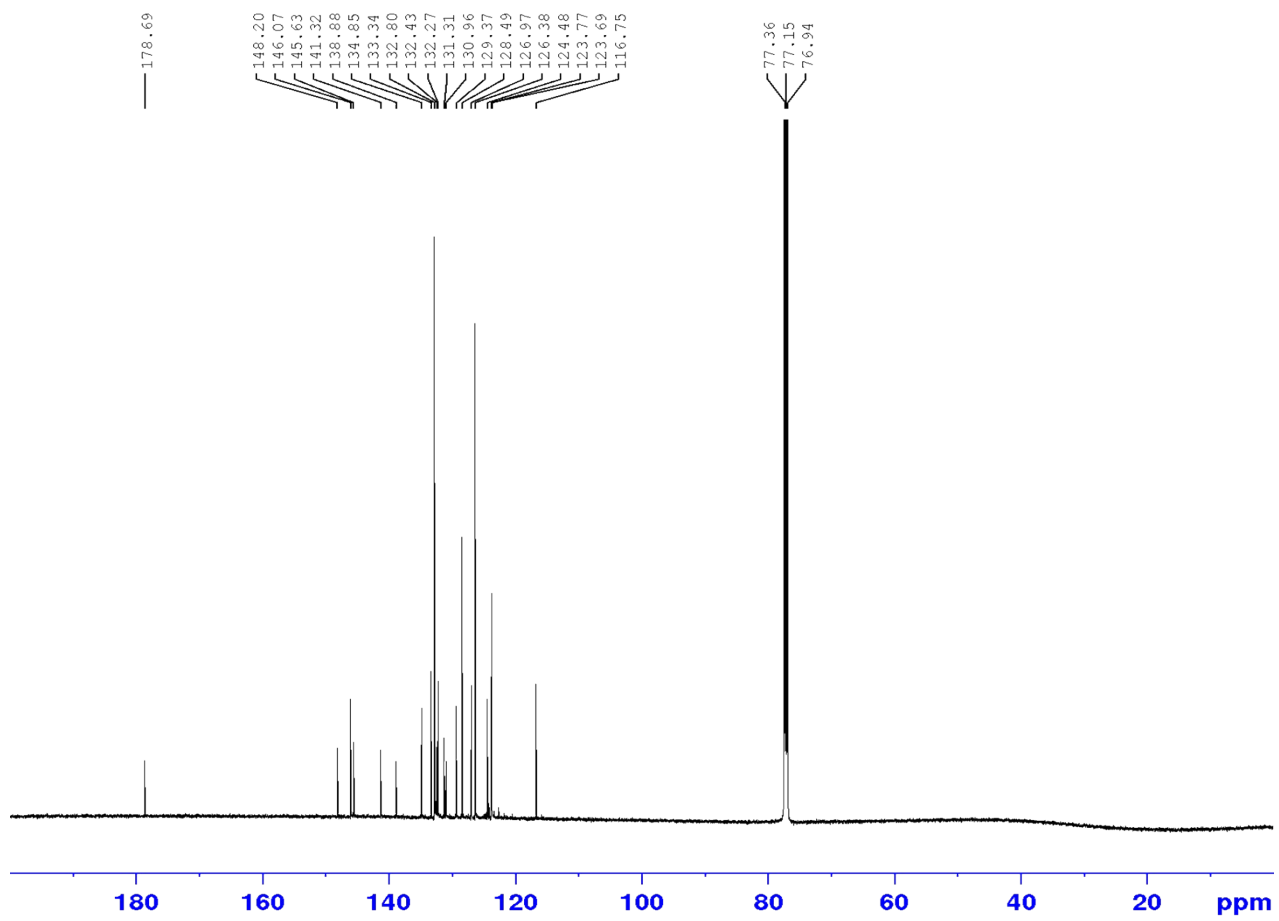

Supplement: d1ra04599g1.pdf [file d1ra04599g1.pdf]
